# Supplementary material for: Aggregate analysis based on TCGA: TTN missense mutation correlates with favorable prognosis in lung squamous cell carcinoma
Source: Springer Nature journal article supplement (doi:10.1007/s00432-019-02861-y), 2019-02-27
Supplement: MOESM8 [file 16513528]

## Sheet: Sheet1
Supplementary Table 8
Comutation of TTN and oncogenes in lung squamous cell carcinoma
Variations	Amount	CNV gain	CNV loss	SNV
Eventsa
EGFR	n=91	56	15	20
ALK	n=62	34	7	21
ROS1	n=76	0	26	50
RET	n=69	35	5	29
Co-SNVb	Co-mutation type		TCGA ID
EGFR/ALK	Missense/Missense		TCGA-66-2742
EGFR/ROS1	Splice Acceptor/Missense		TCGA-60-2698
ALK/RET	Missense/Missense		TCGA-21-1079
*No.of total patients: n=492
aincluding CNVs (Copy number variations) and SNVs (single nucleotide variations) without subtyping
bCNVs, intron and synonymous variations were not considered in this analysis
Journal: Journal of Cancer Research and Clinical Oncology
Title: Aggregate Analysis Based on TCGA：TTN Missense Mutation Correlates with Favorable Prognosis in Lung Squamous Cell Carcinoma
Authors: Xingyu Cheng1, Han Yin1, Juan Fu1, Chunya Chen1, Jianhong An1, Jiexia Guan2, Rong Duan2, Hengming Li2, Hong Shen1, 2
1 School of Medicine, South China University of Technology, Guangzhou Higher Education Mega Center, Guangzhou 510006, P.R. China
2 Departments of Pathology, School of Basic Medical Sciences, Southern Medical University, Guangzhou 510515, P.R. China
Corresponding author: Hong Shen, shenhong2010168@163.com
